# Supplementary material for: Magnetic and optical studies of a new family of multidimensional and multiproperty PO-lanthanide(iii) derived systems
Source: Royal Society of Chemistry journal article supplement (doi:10.1039/d2dt03621e), 2023-01-01
Supplement: d2dt03621e1.pdf [file d2dt03621e1.pdf]

Electronic Supplementary Material (ESI) for Dalton Trans.

## "Magnetic and optical study in a new family of multidimensional and multiproperty PO-lanthanide(III) derived systems."

**Evangelos Pilichos,<sup>a</sup> Annia Tubau,<sup>a</sup> Mercè Font-Bardia,<sup>b</sup> Saskia Speed,<sup>a</sup> Albert Escuer<sup>a,c</sup>  
Arnald Grabulosa<sup>\*a,c</sup> and Júlia Mayans <sup>\*a,c</sup>**

<sup>a</sup> Departament de Química Inorgànica i Orgànica, Secció Inorgànica and Institute of Nanoscience (IN<sup>2</sup>UB) and Nanotechnology, Universitat de Barcelona, Martí i Franquès 1-11, Barcelona-08028, Spain.

<sup>b</sup> Departament de Mineralogia, Cristal·lografia i Dipòsits Minerals, Universitat de Barcelona, Martí Franqués s/n, 08028 Barcelona (Spain) and Unitat de Difracció de R-X. Centre Científic i Tecnològic de la Universitat de Barcelona (CCiTUB), Solé i Sabarís 1-3. 08028 Barcelona.

<sup>c</sup> Institute of Nanoscience and Nanotechnology (IN<sup>2</sup>UB). Universitat de Barcelona, Martí i Franquès 1-11, Barcelona-08028, Spain.

Fig. S1. Powder diffraction spectra

Fig. S2. Infrared spectra for complexes **1** and **3**.

Fig. S3. AC susceptibility measurements for complexes **1** and **5** under different dc applied fields

Fig. S4. Arrhenius-like fit for the high temperature region of complex **6**

Fig. S5. Absorption and emission spectra of the free ligand DppO<sub>2</sub>

Fig. S6. Emission color under irradiation of a UV lamp of compounds **4** and **5**.

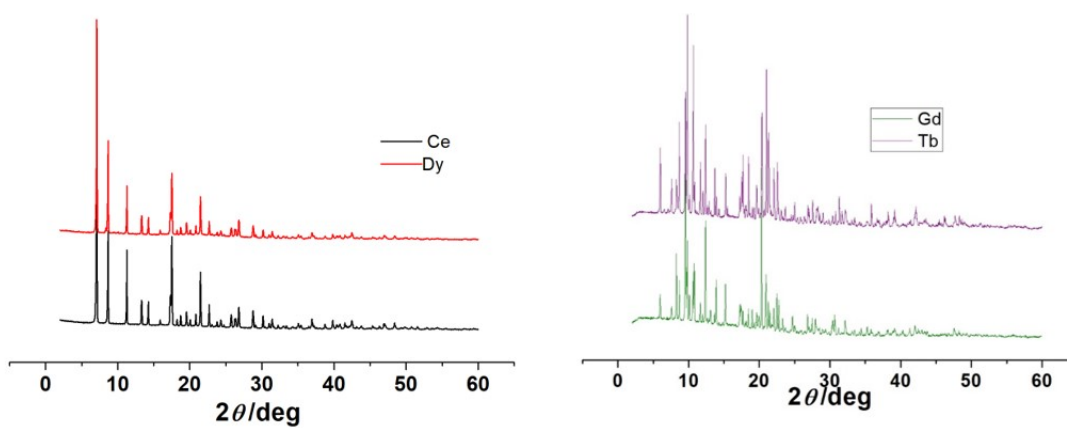

**Fig. S1.** Left, powder diffraction spectra for compounds **1** and **6**. Right, powder diffraction spectra for compounds **4** and **5**.

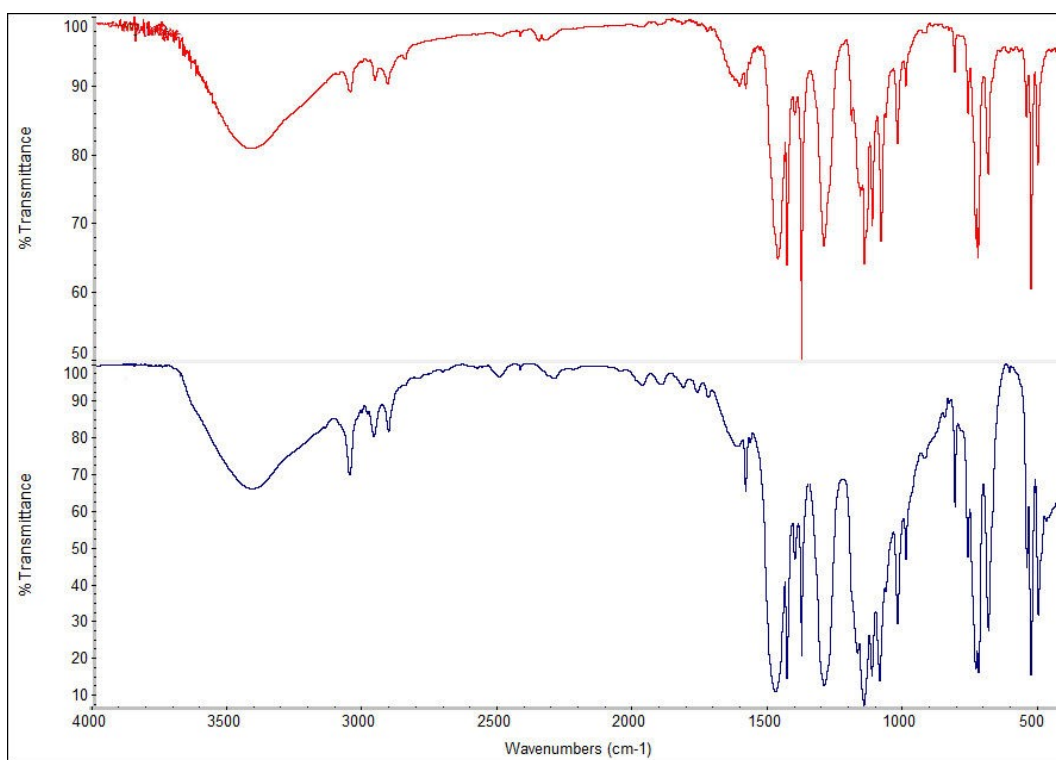

**Fig. S2.** Infrared spectra for the representative 2D Ce<sup>III</sup> complex **1** (top) and the Eu<sup>III</sup> 1D system **3**.

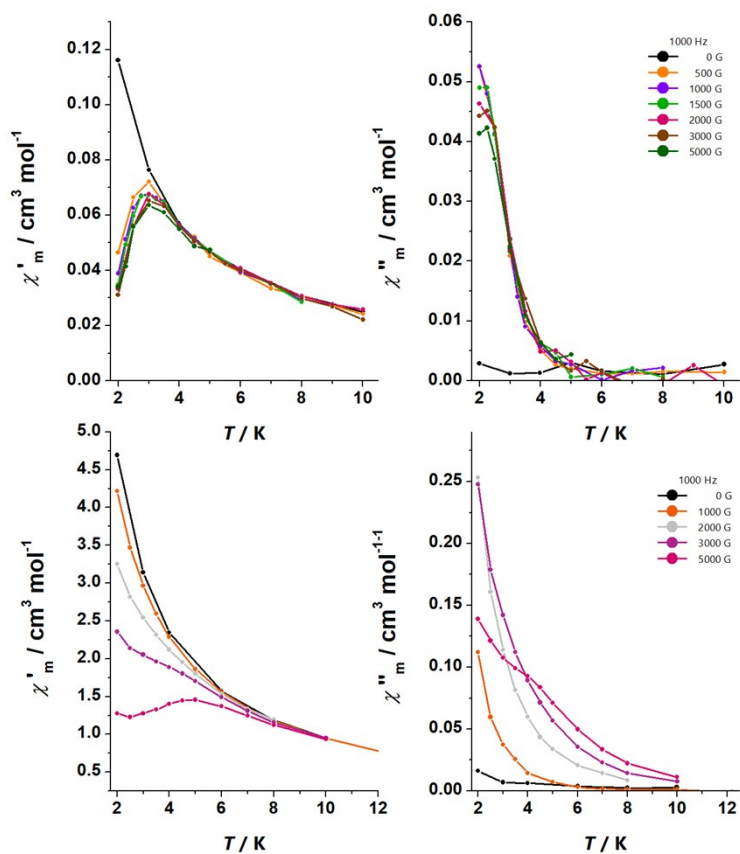

**Fig. S3.** AC susceptibility measurements for complexes **1** (top) and **5** (bottom) under different dc applied fields, showing the tails of out-of-phase signals at low temperature.

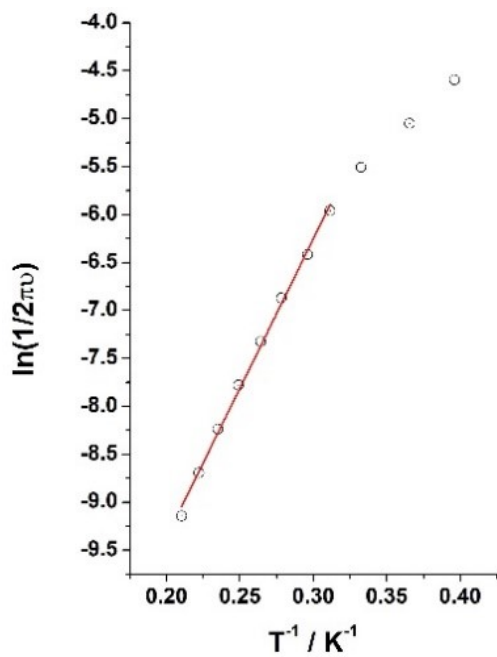

**Fig. S4.** Arrhenius-like fit for the high temperature region of complex **6**.

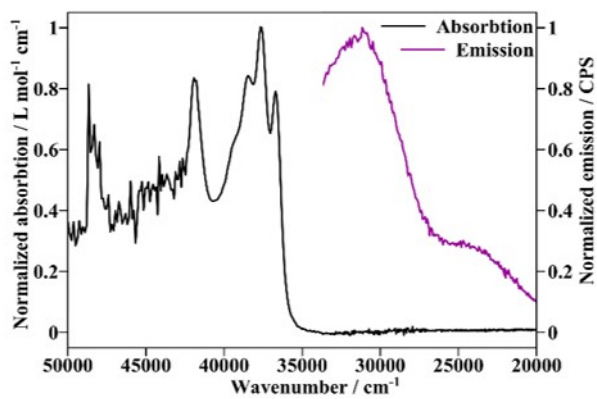

**Fig. S5.** Absorption and emission spectra of the free ligand DppO<sub>2</sub> measured in a  $3.4 \cdot 10^{-6}$  M CHCl<sub>3</sub> solution.

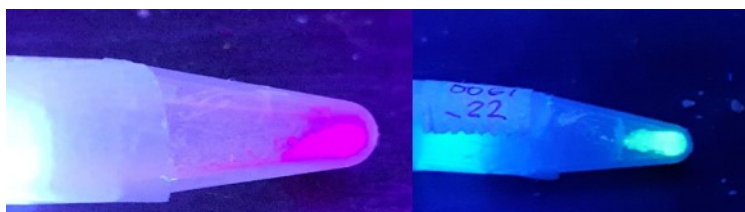

**Fig. S6.** Emission color under irradiation of a UV lamp of compounds **4** (left) and **5** (right).
